# Supplementary material for: Genetic Mapping of QTLs Controlling Fatty Acids Provided Insights into the Genetic Control of Fatty Acid Synthesis Pathway in Peanut (Arachis hypogaea L.)
Source: PLoS One. 2015 Apr 7;10(4):e0119454. doi: 10.1371/journal.pone.0119454 (PMC4388682; doi:10.1371/journal.pone.0119454)
Supplement: S2 Table — This table shows details on location, flanking marker loci, LOD value, phenotypic variance explained and additive effects of 97 M-QTLs detected by QTLCartographer. (XLSX) [file pone.0119454.s002.xlsx]

## Sheet: S2 Table
S2 Table: Main-effect QTLs (M-QTLs) identified for fatty acids by QTLCartographer in T-population
S No.	QTL name	Environment	Linkage group	Nearest Marker	Marker Interval	LOD value	Phenotypic variance (%)	Additive effect (a0)	Higher trait allele
	Palmitic acid (16:0)
1	T_mqPA_a04-1	2010	a04	GM2480	TC7G10-PM652	7.02196	8.6626	-0.394963	GT-C20
2	T_mqPA_a08-1	2010	a08	GM2788	GM2788-TC3B04	2.5432	4.3547	0.282598	Tifrunner
3	T_mqPA_a08-2	2010	a08	TC3B04	GM2788-TC3B04	5.89733	7.1058	0.358121	Tifrunner
4	T_mqPA_a08-3	2010	a08	TC41E09	TC41E09-GNB651	3.05389	4.3337	-0.316157	GT-C20
5	T_mqPA_a09-1	2010	a09	FAD2A	GNB377-FAD2A	10.1065	13.4422	-0.500465	GT-C20
6	T_mqPA_b04-1	2010	b04	TC4H07	PM15-IPAHM451	3.27883	4.0916	-0.269456	GT-C20
7	T_mqPA_b06-1	2010	b06	GM2444	GNB523-GM2767	2.8555	3.2453	-0.27694	GT-C20
8	T_mqPA_b08-1	2010	b08	GM2629	GM2690-1-IPAHM606	2.93876	4.0968	0.275239	Tifrunner
9	T_mqPA_b10	2010	b10	AHS2037	AC3F07-AHS0161	2.811	3.0647	-0.238991	GT-C20
10	T_mqPA_a04-3	2011	a04	TC7G10	TC7G10-PM652	4.06011	6.7911	-0.339655	GT-C20
11	T_mqPA_a09-3	2011	a09	FAD2A	GNB377-FAD2A	21.5192	34.3467	-0.768783	GT-C20
12	T_mqPA_b04-2	2011	b04	PM15	PM15-IPAHM451	5.31675	12.2341	-0.462956	GT-C20
13	T_mqPA_b06-2	2011	b06	GNB523	GNB523-GM2767	3.57514	4.5883	-0.306826	GT-C20
14	T_mqPA_a04-4	mean	a04	TC7G10	TC7G10-PM652	6.67206	10.5589	-0.357063	GT-C20
15	T_mqPA_a08-4	mean	a08	TC3B04	GM2788-TC3B04	3.42616	4.0276	0.222906	Tifrunner
16	T_mqPA_a09-4	mean	a09	FAD2A	GNB377-FAD2A	23.9247	37.3731	-0.686748	GT-C20
17	T_mqPA_b04-3	mean	b04	Seq14D11	PM15-IPAHM451	7.69183	9.7631	-0.342666	GT-C20
18	T_mqPA_b06-3	mean	b06	Seq19F04	GNB523-GM2767	3.76416	4.3088	-0.259692	GT-C20
19	T_mqPA_b08-3	mean	b08	GM2629	GM2690-1-IPAHM606	3.02306	3.6509	0.213078
	Stearic Acid (18:0)
20	T_mqSA_a06	2010	a06	GA21	GA21-TC4C11	2.51142	3.2387	0.166122	Tifrunner
21	T_mqSA_a09-1	2010	a09	FAD2A	GNB377-FAD2A	2.74923	4.1988	-0.189033	GT-C20
22	T_mqSA_b04-1	2010	b04	PM15	PM15-IPAHM451	21.7542	40.5657	0.588957	Tifrunner
23	T_mqSA_b07-1	2010	b07	Seq15C10	GA24-1-Seq15C10	4.19288	7.9925	0.262848	Tifrunner
24	T_mqSA_b08	2010	b08	IPAHM606	GM2690-1-IPAHM606	2.58767	3.1336	-0.16574	GT-C20
25	T_mqSA_a09-2	2011	a09	GM2450	GM2450-GM2792	3.48438	6.102	0.295895	Tifrunner
26	T_mqSA_a09-3	2011	a09	RN26G9	RN26G9-GM1047	5.38723	6.8882	-0.301357	GT-C20
27	T_mqSA_b04-5	2011	b04	TC4H07	PM15-IPAHM451	16.0268	25.6659	0.573145	Tifrunner
28	T_mqSA_b07-3	2011	b07	GM1953	GM2156-GM1953	4.03544	4.6797	-0.246839	GT-C20
29	T_mqSA_b07-4	2011	b07	GM1254	GM1254-GM2744	3.11366	4.3882	0.256993	Tifrunner
30	T_mqSA_a09-4	mean	a09	AHGS0695	AHGS0695-TC1D02	3.05693	3.6154	-0.194001	GT-C20
31	T_mqSA_a09-5	mean	a09	RN26G9	RN26G9-GM1047	5.01889	5.7902	-0.232705	GT-C20
32	T_mqSA_b04-6	mean	b04	TC4H07	PM15-IPAHM451	20.5248	31.4224	0.53134	Tifrunner
33	T_mqSA_b07-5	mean	b07	GM1953	GM2156-GM1953	2.5047	2.6266	-0.154775	GT-C20
34	T_mqSA_b07-6	mean	b07	GM1254	GM1254-GM2744	3.06641	4.2166	0.211103	Tifrunner
	Arachidic Acid (20:0)
35	T_mqAA_a06	2010	a06	GNB329	GM1490-GNB329	2.66171	3.143	0.057382	Tifrunner
36	T_mqAA_a09	2010	a09	FAD2A	GNB377-FAD2A	2.73184	4.6294	-0.067693	GT-C20
37	T_mqAA_b04-1	2010	b04	PM15	PM15-IPAHM451	18.4142	36.9256	0.19207	Tifrunner
38	T_mqAA_b07	2010	b07	Seq15C10	GA24-1-Seq15C10	2.55376	5.4013	0.07355	Tifrunner
39	T_mqAA_b08-2	2010	b08	IPAHM606	GM2690-1-IPAHM606	2.92238	3.4181	-0.059275	GT-C20
40	T_mqAA_a09-1	2011	a09	GM2450	GM2450-GM2792	2.76347	4.6378	0.075656	Tifrunner
41	T_mqAA_a09-2	2011	a09	RN26G9	RN26G9-GM1047	3.69585	4.6015	-0.072252	GT-C20
42	T_mqAA_b03	2011	b03	Seq16F01	Seq16F01-GNB70	2.63673	5.4763	-0.07734	GT-C20
43	T_mqAA_b04	2011	b04	TC4H07	PM15-IPAHM451	17.4335	29.6035	0.180326	Tifrunner
44	T_mqAA_b07-1	2011	b07	GM1953	GM2156-GM1953	3.44477	3.9912	-0.066983	GT-C20
45	T_mqAA_b07-2	2011	b07	GM1254	GM1254-GM2744	3.59739	4.7914	0.079194	Tifrunner
46	T_mqAA_a09	mean	a09	RN26G9	RN26G9-GM1047	3.78486	4.6736	-0.065276	GT-C20
47	T_mqAA_b04	mean	b04	TC4H07	PM15-IPAHM451	22.2786	35.1676	0.174117	Tifrunner
48	T_mqAA_b06	mean	b06	AHGS0590	AHGS0369-AHGS0590	2.54669	3.0466	0.051805	Tifrunner
	Gadoleic Acid (20:1)
49	T_mqGA_a04-1	2010	a04	AHGS0347	AHGS0347-GM2638	4.71683	6.5681	0.082596	Tifrunner
50	T_mqGA_a06-1	2010	a06	GA21	GA21-TC4C11	6.02019	8.5152	-0.093836	GT-C20
51	T_mqGA_a09-1	2010	a09	FAD2A	GNB377-FAD2A	8.20433	11.1668	0.105833	Tifrunner
52	T_mqGA_b02	2010	b02	TC1B02	TC1B02-GNB317-1	2.96586	3.0167	-0.05413	GT-C20
53	T_mqGA_b04-1	2010	b04	TC4H07	PM15-IPAHM451	15.1118	26.1362	-0.159722	GT-C20
54	T_mqGA_b07-1	2010	b07	GM1254	GM1254-GM2744	2.68138	3.6802	-0.065834	GT-C20
55	T_mqGA_a04-3	2011	a04	GNB733	AHGS0347-GM2638	4.49721	5.2646	0.081991	Tifrunner
56	T_mqGA_a06-3	2011	a06	GNB329	GM1490-GNB329	3.27086	4.4521	-0.076005	GT-C20
57	T_mqGA_a09-2	2011	a09	FAD2A	GNB377-FAD2A	11.2903	16.2379	0.137176	Tifrunner
58	T_mqGA_b03-1	2011	b03	Seq2F05	Seq2F05-Ah590	2.83151	5.4915	0.082929	Tifrunner
59	T_mqGA_b04-5	2011	b04	TC4H07	PM15-IPAHM451	7.75311	12.9836	-0.126591	GT-C20
60	T_mqGA_b07-2	2011	b07	GM2156	GM2156-GM1953	2.92384	4.2664	0.072257	Tifrunner
61	T_mqGA_b07-3	2011	b07	GM1254	GM1254-GM2744	4.01921	6.243	-0.095606	GT-C20
62	T_mqGA_b09	2011	b09	GM1655	GM1655-AS1R12A06	3.17583	6.0445	-0.091094	GT-C20
63	T_mqGA_a04-4	mean	a04	IPAHM108-1	AHGS0347-GM2638	5.42214	5.6045	0.073937	Tifrunner
64	T_mqGA_a06-4	mean	a06	GM1490	GM1490-GNB329	3.78728	4.0512	-0.063475	GT-C20
65	T_mqGA_a09-3	mean	a09	FAD2A	GNB377-FAD2A	11.1038	15.755	0.122684	Tifrunner
66	T_mqGA_b03-2	mean	b03	Seq2F05	Seq2F05-Ah590	2.90807	5.7104	0.073807	Tifrunner
67	T_mqGA_b04-6	mean	b04	PM15	PM15-IPAHM451	13.9016	25.5162	-0.15598	GT-C20
68	T_mqGA_b07-4	mean	b07	GM2156	GM2156-GM1953	2.98205	2.9826	0.053328	Tifrunner
	Behenic Acid (22:0)
69	T_mqBA_a03-1	2010	a03	GNB167	GNB167-GM2528	2.979	6.2618	0.115469	Tifrunner
70	T_mqBA_a05-1	2010	a05	GNB827	Ah426-GNB703	3.67073	6.2558	-0.113485	GT-C20
71	T_mqBA_b04-1	2010	b04	PM15	PM15-IPAHM451	3.09336	9.6128	0.147313	Tifrunner
72	T_mqBA_b09	2010	b09	GM2120	GM2120-Seq7G02	3.05271	6.3143	0.115724	Tifrunner
73	T_mqBA_a01-1	2011	a01	TC20B05	TC20B05-GM2196	3.3772	5.6688	0.103421	Tifrunner
74	T_mqBA_a03-3	2011	a03	GNB167	GNB167-GM2528	2.5902	5.0842	0.098278	Tifrunner
75	T_mqBA_a05-2	2011	a05	GA65	GA65-GNB464	2.54361	4.7414	-0.101245	GT-C20
76	T_mqBA_a08-1	2011	a08	Ad92L5	GM1901-IPAHM468	4.25415	5.4731	0.107113	Tifrunner
77	T_mqBA_a09-2	2011	a09	PM343	GM2450-GM2792	5.62733	9.2421	0.130911	Tifrunner
78	T_mqBA_b04-3	2011	b04	TC4H07	PM15-IPAHM451	7.5009	12.3742	0.150275	Tifrunner
79	T_mqBA_a01-2	mean	a01	TC20B05	TC20B05-GM2196	3.10463	5.632	0.089884	Tifrunner
80	T_mqBA_a03-4	mean	a03	GNB167	GNB167-GM2528	4.13775	8.7242	0.110824	Tifrunner
81	T_mqBA_a05-3	mean	a05	GA65	GA65-GNB464	3.39863	5.8877	-0.098696	GT-C20
82	T_mqBA_a08-2	mean	a08	IPAHM468	IPAHM468-TC2A02-1	4.34632	7.5705	0.105139	Tifrunner
83	T_mqBA_a09-3	mean	a09	PM343	GM2450-GM2792	4.90303	8.1285	0.106878	Tifrunner
84	T_mqBA_b04-4	mean	b04	TC4H07	PM15-IPAHM451	8.0837	13.5624	0.137174	Tifrunner
	Lignoceric Acid (24:0)
85	T_mqLA_b02	2010	b02	TC1B02	TC1B02-GNB317-1	3.0957	6.5029	-0.06603	GT-C20
86	T_mqLA_b04-2	2010	b04	TC4H07	PM15-IPAHM451	4.03707	8.1961	-0.075032	GT-C20
87	T_mqLA_b07-2	2010	b07	GM1254	GM1254-Ad95D7	2.56428	4.8832	-0.062672	GT-C20
88	T_mqLA_a04-2	2011	a04	IPAHM108-1	AHGS0347-GM2638	2.7227	3.8499	0.052147	Tifrunner
89	T_mqLA_a08	2011	a08	GM1901	GM1901-Ad92L5	2.65833	4.6457	0.056494	Tifrunner
90	T_mqLA_a09-3	2011	a09	FAD2A	GNB377-FAD2A	6.23238	12.4911	0.091261	Tifrunner
91	T_mqLA_b04-5	2011	b04	PM15	PM15-IPAHM451	3.69277	10.0278	-0.082159	GT-C20
92	T_mqLA_b07-3	2011	b07	GM1254	GM1254-Ad95D7	3.26502	6.4808	-0.071941	GT-C20
93	T_mqLA_a04-1	mean	a04	IPAHM108-1	AHGS0347-GM2638	5.20079	7.0883	0.059618	Tifrunner
94	T_mqLA_a09-1	mean	a09	FAD2A	GNB377-FAD2A	4.05052	7.5165	0.060804	Tifrunner
95	T_mqLA_b04-1	mean	b04	PM15	PM15-IPAHM451	4.84432	12.6134	-0.078737	GT-C20
96	T_mqLA_b05	mean	b05	TC9B12-2	TC9B12-2-GM1788	2.82924	4.7198	-0.047731	GT-C20
97	T_mqLA_b07-1	mean	b07	GM1254	GM1254-Ad95D7	4.86714	9.7902	-0.075045	GT-C20
