# Supplementary material for: Genetic Mapping of QTLs Controlling Fatty Acids Provided Insights into the Genetic Control of Fatty Acid Synthesis Pathway in Peanut (Arachis hypogaea L.)
Source: PLoS One. 2015 Apr 7;10(4):e0119454. doi: 10.1371/journal.pone.0119454 (PMC4388682; doi:10.1371/journal.pone.0119454)
Supplement: S4 Table — This table shows details on location, flanking marker loci, phenotypic variance explained and additive effects of 21 M-QTLs detected by QTLNetwork. (XLSX) [file pone.0119454.s004.xlsx]

## Sheet: S4 Table
S4 Table: Main-effect QTLs (M-QTLs) identified for fatty acids by QTLNetwork in T-population
S No.	QTL name	Linkage group	QTL interval	Position	Range	PV (%)	A	SE	P-Value	AE1	SE	P-Value	AE2	SE	P-Value
	Palmitic acid (16:0)
1	T_mqPA_a04-2	a04	GNB65-GM2480	62.6	61.6-63.7	6.44	-0.3009	0.0496	0	-0.0572	0.058	0.323274	0.0576	0.0579	0.319342
2	T_mqPA_a09-2	a09	GNB377-FAD2A	89	85.0-89.0	22.58	-0.5862	0.0468	0	0.0978	0.0601	0.103566	-0.0958	0.06	0.110068
3	T_mqPA_b08-2	b08	GM1961-GM2689	58	55.7-59.0	0.16	0.1825	0.0492	0.000209	0.0451	0.0528	0.393336	-0.0454	0.0528	0.389483
	Stearic Acid (18:0)
4	T_mqSA_b04-2	b04	IPAHM108-2-PM35	95.6	90.6-101.1	17.8	0.1879	0.0427	1.1e-05	0	0.0021	0.986464	0	0.0021	0.986167
5	T_mqSA_b04-3	b04	PM15-AHGS0230	119.3	116.3-121.5	28.93	0.2728	0.0371	0	-0.0001	0.0021	0.979672	0.0001	0.0021	0.979886
6	T_mqSA_b04-4	b04	TC4H07-IPAHM451	132.2	129.2-136.2	27.14	0.3137	0.0408	0	0	0.0021	0.981719	0	0.0021	0.981981
7	T_mqSA_b07-2	b07	GM1254-GM2605	81.6	76.5-85.6	0.72	0.2655	0.0397	0	-0.0134	0.0326	0.681958	0.0132	0.0326	0.684649
	Arachidic Acid (20:0)
8	T_mqAA_b04-2	b04	TC5D06-GM1445	26.1	24.4-31.1	4.38	0.0376	0.0103	0.000281	0	0.0016	0.986366	0	0.0016	0.98743
9	T_mqAA_b04-3	b04	AHGS0230-Seq14D11	120.5	116.3-122.5	28.8	0.096	0.0114	0	0	0.0016	0.989317	0	0.0016	0.989504
10	T_mqAA_b04-4	b04	TC4H07-IPAHM451	133.2	129.2-136.2	28.32	0.1047	0.0126	0	0	0.0017	0.975893	0	0.0017	0.976319
	Gadoleic Acid (20:1)
11	T_mqGA_a04-2	a04	GM2480-PM652	63.7	62.7-66.6	2.98	0.0835	0.0132	0	0.0001	0.0023	0.956541	-0.0001	0.0023	0.95652
12	T_mqGA_a06-2	a06	TC41C11-Seq15D03	134	131.6-136.0	2.93	-0.0666	0.0121	0	0.0001	0.0023	0.978078	-0.0001	0.0023	0.97933
13	T_mqGA_b04-2	b04	IPAHM108-2-PM35	94.6	89.6-103.1	11.99	-0.0394	0.0156	0.011274	-0.0001	0.0024	0.977746	0.0001	0.0024	0.97728
14	T_mqGA_b04-3	b04	PM15-AHGS0230	118.3	115.3-121.5	16.84	-0.08	0.0142	0	0	0.0024	0.988992	0	0.0024	0.988736
15	T_mqGA_b04-4	b04	TC4H07-IPAHM451	136.2	132.2-140.2	13.69	-0.0989	0.0153	0	-0.0001	0.0024	0.975566	0.0001	0.0024	0.97558
	Behenic Acid (22:0)
16	T_mqBA_a03-2	a03	GNB167-GM2528	40.9	39.9-42.9	4.89	0.1072	0.0229	3e-06	0	0.003	0.992586	0	0.003	0.993127
17	T_mqBA_a09-1	a09	PM343-GM2792	21.5	17.1-23.5	7.07	0.1221	0.0182	0	-0.0002	0.0029	0.940788	0.0002	0.0029	0.939452
18	T_mqBA_b04-2	b04	TC4H07-IPAHM451	133.2	127.5-138.2	9.44	0.1531	0.02	0	-0.0063	0.0147	0.670478	0.0064	0.0147	0.664262
	Lignoceric Acid (24:0)
19	T_mqLA_a04-3	a04	IPAHM108-1-RN9C02	130.8	126.8-139.8	3.79	0.055	0.0104	0	0.0001	0.0023	0.982606	0	0.0023	0.983484
20	T_mqLA_a09-2	a09	GNB377-FAD2A	85	81.0-89.0	4.45	0.0677	0.0128	0	-0.0165	0.0152	0.2785	0.0169	0.0152	0.265377
21	T_mqLA_b04-3	b04	TC4H07-IPAHM451	134.2	126.5-140.2	4.5	-0.0719	0.0131	0	-0.0002	0.0023	0.935246	0.0002	0.0023	0.935328
